# Supplementary material for: Atomically precise chiral silver clusters based on non-chiral ligands for acid/base stimulated luminescence response
Source: Royal Society of Chemistry journal article supplement (doi:10.1039/d3nr03095d), 2023-01-01
Supplement: d3nr03095d1.pdf [file d3nr03095d1.pdf]

## ***Supporting Information***

### **Atomically precise chiral Ag<sub>6</sub> nanoclusters based on non-chiral ligands for acid/base stimulated luminescence response**

Shuaibo Wang,<sup>a</sup> Weimiao He,<sup>a</sup> Yujia Cui,<sup>a</sup> Zhan Zhou,<sup>a,b,\*</sup> Lufang Ma,<sup>a,b</sup> Shuang-Quan Zang<sup>a,\*</sup>

<sup>a</sup>College of Chemistry, Zhengzhou University, Zhengzhou 450001, China

<sup>b</sup>College of Chemistry and Chemical Engineering, Henan Key Laboratory of Function-Oriented Porous Materials, Luoyang Normal University, Luoyang, 471934, China

\*Corresponding author. Email: [zhouzhan@lynu.edu.cn](mailto:zhouzhan@lynu.edu.cn); [zangsqzg@zzu.edu.cn](mailto:zangsqzg@zzu.edu.cn)

**Crystallographic data collection and structural refinement:** Single-crystal X-ray diffraction measurements of **Ag<sub>6</sub>-Rac**, **Ag<sub>6</sub>-S** and **Ag<sub>6</sub>-R** were performed on a Rigaku XtaLAB Pro diffractometer with Cu-K $\alpha$  radiation ( $\lambda = 1.54184$  Å) at 200/150 K. Data collection and reduction were performed using the program *CrysAlisPro*<sup>[1,2]</sup>. All the structures were solved with direct methods (*SHELXS*)<sup>[3]</sup> and refined by full-matrix least-squares on F<sup>2</sup> using *OLEX2*<sup>[4]</sup>, which utilizes the *SHELXL2015* module<sup>[5]</sup>. All atoms are anisotropically refined, and the hydrogen atoms are placed at calculated positions in the ideal geometry and assigned fixed isotropic displacement parameters. There was a large solvent-accessible void volume in the crystals of **Ag<sub>6</sub>-Rac**, **Ag<sub>6</sub>-S** and **Ag<sub>6</sub>-R**, which were occupied by highly disordered solvent molecules. The disordered solvent molecules in the structure could not be well identified, so the ‘Solvent Mask’ was adopted to remove them during structural refinement. The detailed information of the crystal data and refinement results for three compounds are summarized in Supplementary Table S1.

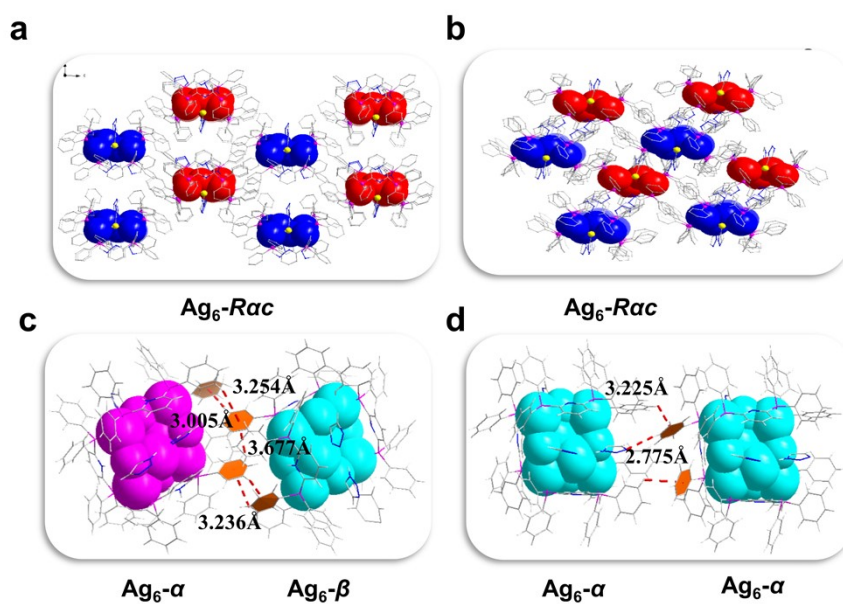

**Figure S1.** Packing of enantiomers in the lattice of  $Ag_6-Rac$ . (a, b) Packing structures viewed along the b and c axis. (c) Intercluster weak interactions in the same layer. (d) Intercluster weak interactions between neighboring layers. Color labels: green, blue, red, Ag; yellow, S; pink, P; gray, C; light blue, N; light gray, H. Red dashed lines indicate the weak interaction.

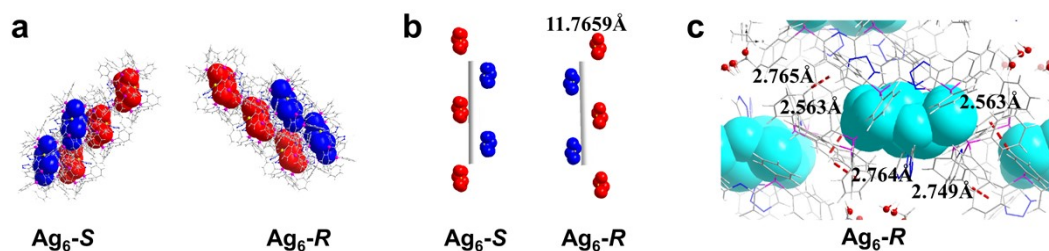

**Figure S2.** Cluster structure analysis diagram. (a) Spiral stacking figure of  $Ag_6-S$ ,  $Ag_6-R$ . (b) Smaller helix surrounding the helical tubes. (c) Weak intercluster forces. Color labels: blue, red, Ag; gray, C; light gray, H. Green dashed lines indicate the weak interaction.

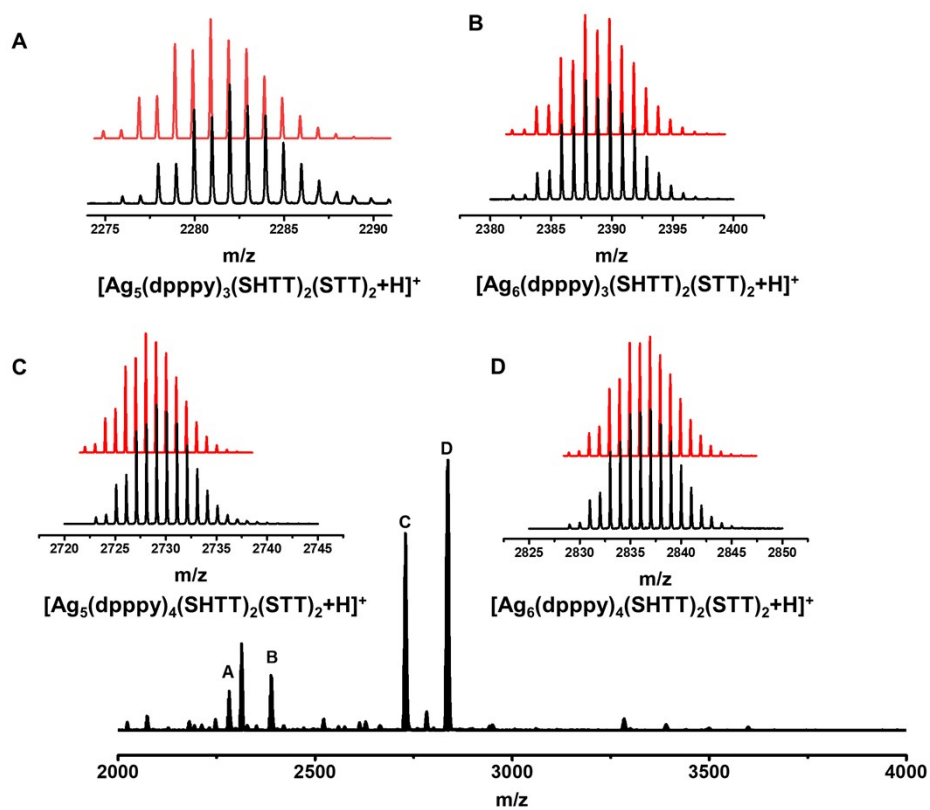

**Figure S3.** Mass spectra of racemic conglomerate  $Ag_6$ -S/R.

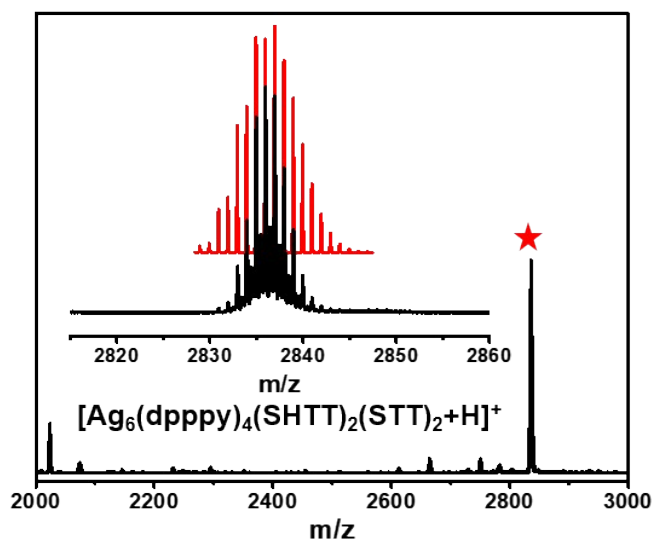

**Figure S4.** Mass spectra of  $Ag_6$ -Rac.

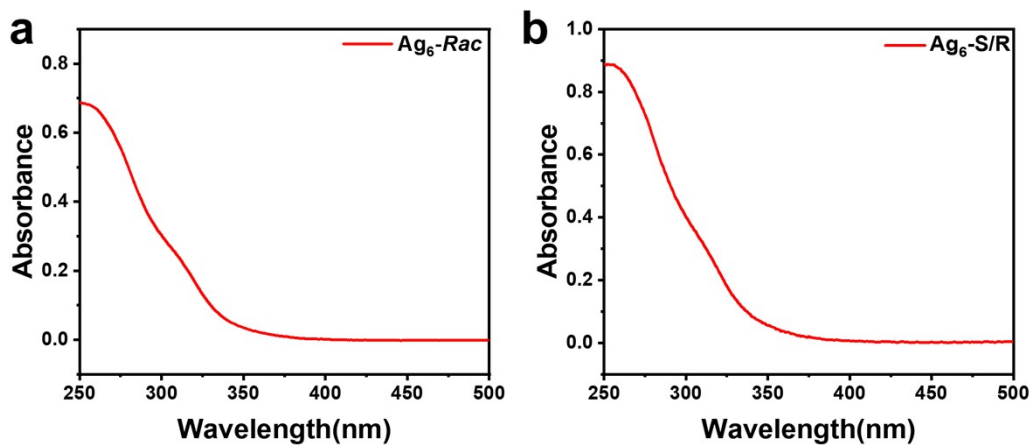

Figure S5. UV-Vis spectra of (a)  $\text{Ag}_6\text{-Rac}$  and (b)  $\text{Ag}_6\text{-S/R}$ .

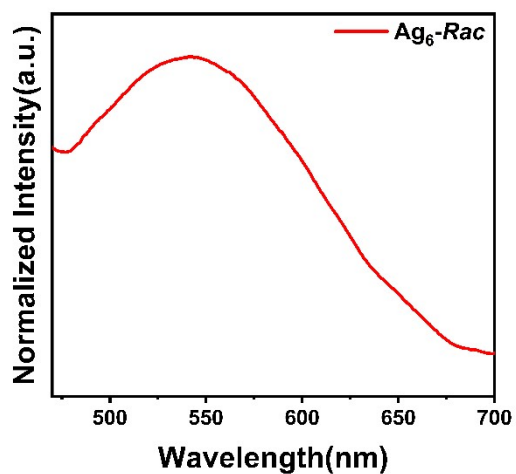

Figure S6. Fluorescence emission spectrum ( $\lambda_{\text{ex}} = 365$  nm) of  $\text{Ag}_6\text{-Rac}$  in solid state.

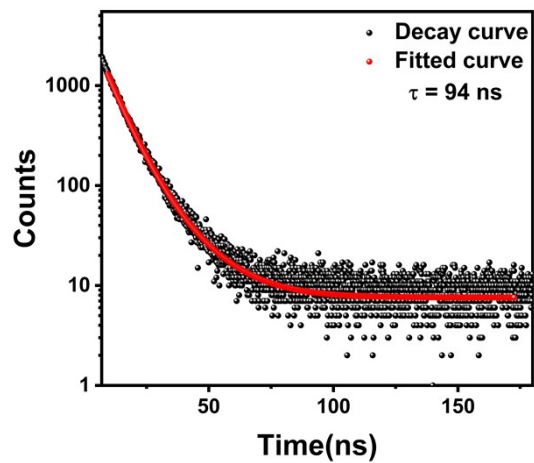

**Figure S7.** Temperature-dependent fluorescence decays of  $\text{Ag}_6\text{-Rac}$  in solid state.

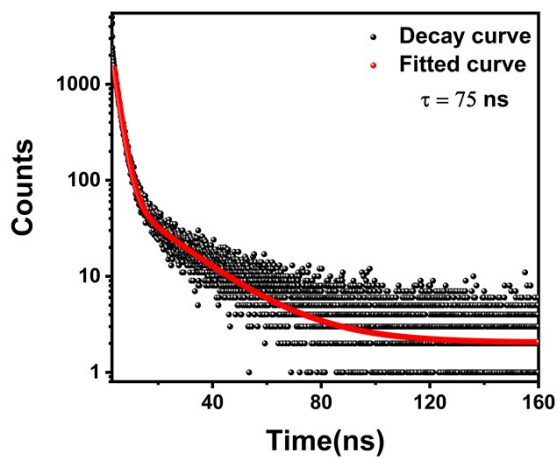

**Figure S8.** Temperature-dependent fluorescence decays of  $\text{Ag}_6\text{-S/R}$  solid (freshly prepared crystals).

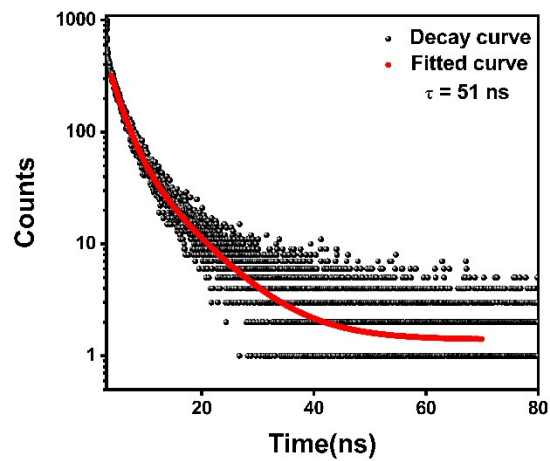

**Figure S9.** Temperature-dependent fluorescence decays of dry  $\text{Ag}_6\text{-S/R}$  solids.

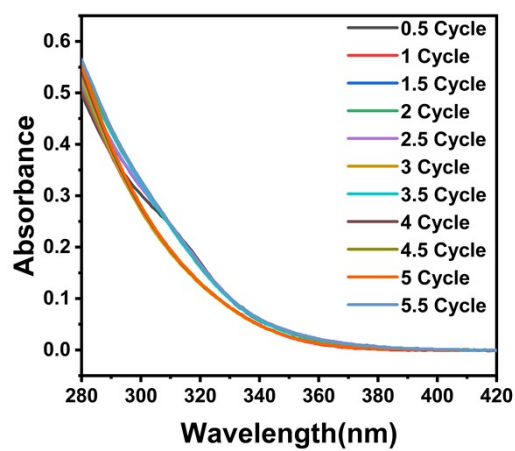

**Figure S10.** UV/Vis absorption spectrum of  $\text{Ag}_6\text{-Rac}$  on acid-base stimulation response.

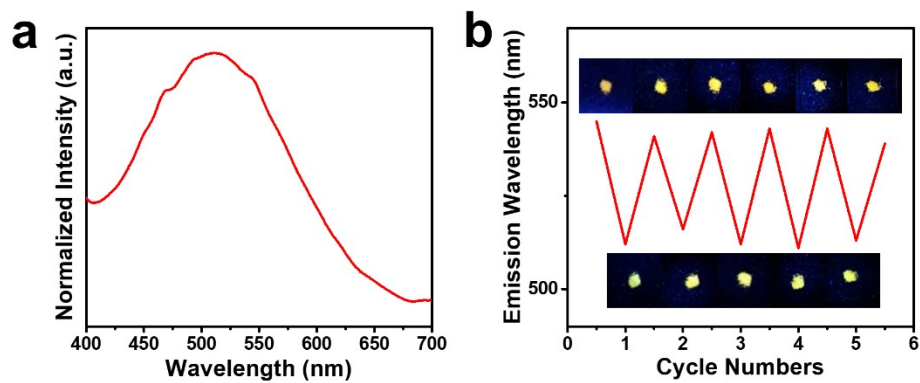

**Figure S11.** (a) Fluorescence emission diagram ( $\lambda_{ex} = 365$  nm) of **Ag<sub>6</sub>-Rac** in solid state under acidic environment. (b) Recycle diagram of **Ag<sub>6</sub>-Rac** cluster at different emission wavelength (545 and 512 nm) with the fumigate by TFA or DEA. (Inset: Fluorescence photos of **Ag<sub>6</sub>-Rac** solid were treated by (top) TFA and (below) DEA)



| Compound                                                     | <b>Ag<sub>6</sub>-R</b>                                                                        | <b>Ag<sub>6</sub>-S</b>                                                                        | <b>Ag<sub>6</sub>-Rac</b>                                                                                      |
|--------------------------------------------------------------|------------------------------------------------------------------------------------------------|------------------------------------------------------------------------------------------------|----------------------------------------------------------------------------------------------------------------|
| CCDC number                                                  | 2211323                                                                                        | 2211324                                                                                        | 2211325                                                                                                        |
| Empirical formula                                            | C <sub>124</sub> H <sub>98</sub> Ag <sub>6</sub> N <sub>16</sub> P <sub>8</sub> S <sub>4</sub> | C <sub>124</sub> H <sub>98</sub> Ag <sub>6</sub> N <sub>16</sub> P <sub>8</sub> S <sub>4</sub> | C <sub>124</sub> H <sub>102</sub> Ag <sub>6</sub> N <sub>16</sub> O <sub>2</sub> P <sub>8</sub> S <sub>4</sub> |
| Formula weight                                               | 2835.40                                                                                        | 2835.40                                                                                        | 2866.04                                                                                                        |
| Temperature/K                                                | 150.00                                                                                         | 150.00                                                                                         | 200.00                                                                                                         |
| Crystal system                                               | orthorhombic                                                                                   | orthorhombic                                                                                   | triclinic                                                                                                      |
| Space group                                                  | <i>P</i> 2 <sub>1</sub> 2 <sub>1</sub> 2 <sub>1</sub>                                          | <i>P</i> 2 <sub>1</sub> 2 <sub>1</sub> 2 <sub>1</sub>                                          | <i>P</i> -1                                                                                                    |
| <i>a</i> /Å                                                  | 24.05180(10)                                                                                   | 24.01420(10)                                                                                   | 14.4279(2)                                                                                                     |
| <i>b</i> /Å                                                  | 24.08610(10)                                                                                   | 24.14150(10)                                                                                   | 17.4914(3)                                                                                                     |
| <i>c</i> /Å                                                  | 24.12200(10)                                                                                   | 24.1607(2)                                                                                     | 26.3185(4)                                                                                                     |
| <i>α</i> /°                                                  | 90                                                                                             | 90                                                                                             | 94.0460(10)                                                                                                    |
| <i>β</i> /°                                                  | 90                                                                                             | 90                                                                                             | 91.3660(10)                                                                                                    |
| <i>γ</i> /°                                                  | 90                                                                                             | 90                                                                                             | 109.9500(10)                                                                                                   |
| Volume/Å <sup>3</sup>                                        | 13974.21(10)                                                                                   | 14006.90(14)                                                                                   | 6219.58(17)                                                                                                    |
| Z                                                            | 4                                                                                              | 4                                                                                              | 2                                                                                                              |
| $\rho_{calc}$ /g cm <sup>-3</sup>                            | 1.348                                                                                          | 1.345                                                                                          | 1.530                                                                                                          |
| $\mu$ /mm <sup>-1</sup>                                      | 8.418                                                                                          | 8.399                                                                                          | 9.415                                                                                                          |
| <i>F</i> (000)                                               | 5680.0                                                                                         | 5680.0                                                                                         | 2875.0                                                                                                         |
| Crystal size/mm <sup>3</sup>                                 | 0.12 × 0.09 × 0.07                                                                             | 0.12 × 0.11 × 0.08                                                                             | 0.14 × 0.12 × 0.1                                                                                              |
| Radiation                                                    | Cu K $\alpha$ ( $\lambda$ = 1.54184)                                                           | Cu K $\alpha$ ( $\lambda$ = 1.54184)                                                           | Cu K $\alpha$ ( $\lambda$ = 1.54184)                                                                           |
| 2 $\theta$ range for data collection/°                       | 5.184 to 149.204                                                                               | 5.174 to 149.55                                                                                | 5.394 to 130.998                                                                                               |
| Index ranges                                                 | -29 ≤ <i>h</i> ≤ 30,<br>-30 ≤ <i>k</i> ≤ 29,<br>-30 ≤ <i>l</i> ≤ 29                            | 29 ≤ <i>h</i> ≤ 29,<br>-30 ≤ <i>k</i> ≤ 30,<br>-28 ≤ <i>l</i> ≤ 29                             | -17 ≤ <i>h</i> ≤ 17,<br>-20 ≤ <i>k</i> ≤ 17,<br>-26 ≤ <i>l</i> ≤ 31                                            |
| Reflections collected                                        | 351767                                                                                         | 33960                                                                                          | 65292                                                                                                          |
| Independent reflections                                      | 28438 [ <i>R</i> <sub>int</sub> = 0.0558,<br><i>R</i> <sub>sigma</sub> = 0.0231]               | 28183 [ <i>R</i> <sub>int</sub> = 0.1031,<br><i>R</i> <sub>sigma</sub> = 0.0409]               | 21270 [ <i>R</i> <sub>int</sub> = 0.0684,<br><i>R</i> <sub>sigma</sub> = 0.0800]                               |
| Data/restraints/parameters                                   | 28438/0/1424                                                                                   | 28196/0/1424                                                                                   | 21270/104/1504                                                                                                 |
| Goodness-of-fit on <i>F</i> <sup>2</sup>                     | 1.040                                                                                          | 1.029                                                                                          | 1.062                                                                                                          |
| Final <i>R</i> indexes [ <i>I</i> ≥ 2 $\sigma$ ( <i>I</i> )] | <i>R</i> <sub>1</sub> = 0.0369, <i>wR</i> <sub>2</sub> =<br>0.0983                             | <i>R</i> <sub>1</sub> = 0.0415, <i>wR</i> <sub>2</sub> =<br>0.1176                             | <i>R</i> <sub>1</sub> = 0.0628, <i>wR</i> <sub>2</sub> =<br>0.1451                                             |
| Final <i>R</i> indexes [all data]                            | <i>R</i> <sub>1</sub> = 0.0388, <i>wR</i> <sub>2</sub> =<br>0.0994                             | <i>R</i> <sub>1</sub> = 0.0462, <i>wR</i> <sub>2</sub> =<br>0.1194                             | <i>R</i> <sub>1</sub> = 0.0934, <i>wR</i> <sub>2</sub> =<br>0.1564                                             |
| Flack parameter                                              | -0.0088(18)                                                                                    | -0.006(2)                                                                                      |                                                                                                                |

**Table S1. Crystallographic data and structure refinement.**

$$R_1 = \sum ||F_o| - |F_c|| / \sum |F_o|. \quad wR_2 = [\sum w(F_o^2 - F_c^2)^2 / \sum w(F_o^2)^2]^{1/2}$$

**Table S2 The main bond lengths (Å) for Ag<sub>6</sub>-R.**

| Atom | Atom | Length/Å   |
|------|------|------------|
| Ag3  | Ag4  | 3.0736(7)  |
| Ag3  | Ag2  | 3.0363(6)  |
| Ag3  | P4   | 2.4591(15) |
| Ag3  | S4   | 2.6034(14) |
| Ag3  | P3   | 2.4555(14) |
| Ag3  | S1   | 2.7049(15) |
| Ag1  | Ag2  | 2.9661(7)  |
| Ag1  | P8   | 2.4422(15) |
| Ag1  | S4   | 2.6169(14) |
| Ag1  | P2   | 2.4450(15) |
| Ag1  | S3   | 2.7764(17) |
| Ag6  | Ag4  | 2.8807(7)  |
| Ag6  | P5   | 2.4527(15) |
| Ag6  | S2   | 2.7899(16) |
| Ag6  | P6   | 2.4406(15) |
| Ag6  | S1   | 2.6951(15) |
| Ag5  | S2   | 2.7221(16) |
| Ag5  | P1   | 2.5155(16) |
| Ag5  | P7   | 2.5162(15) |
| Ag5  | S3   | 2.7429(17) |
| Ag4  | Ag2  | 2.8527(7)  |
| Ag4  | S2   | 2.5894(17) |
| Ag4  | S1   | 2.4937(16) |
| Ag4  | N11  | 2.185(5)   |
| Ag2  | S4   | 2.5871(16) |
| Ag2  | S3   | 2.5296(18) |
| Ag2  | N8   | 2.237(5)   |

**Table S3 The main bond lengths (Å) for Ag<sub>6</sub>-S.**

| Atom | Atom | Length/Å   |
|------|------|------------|
| Ag3  | Ag4  | 3.0851(7)  |
| Ag3  | Ag2  | 3.0383(7)  |
| Ag3  | S2   | 2.6016(16) |
| Ag3  | P1   | 2.4555(17) |
| Ag3  | P2   | 2.4555(18) |
| Ag3  | S3   | 2.6959(17) |
| Ag1  | Ag2  | 2.9499(8)  |
| Ag1  | P3   | 2.4450(17) |
| Ag1  | S2   | 2.6172(15) |
| Ag1  | P4   | 2.4467(18) |
| Ag1  | S1   | 2.768(2)   |
| Ag6  | Ag4  | 2.8815(7)  |
| Ag6  | P8   | 2.4525(18) |
| Ag6  | S4   | 2.7785(18) |
| Ag6  | P7   | 2.4433(18) |
| Ag6  | S3   | 2.6984(17) |
| Ag5  | P6   | 2.5165(18) |
| Ag5  | S4   | 2.7221(18) |
| Ag5  | P5   | 2.5167(18) |
| Ag5  | S1   | 2.750(2)   |
| Ag4  | Ag2  | 2.8442(9)  |
| Ag4  | S4   | 2.5853(19) |
| Ag4  | S3   | 2.4941(19) |
| Ag4  | N11  | 2.186(6)   |
| Ag2  | S2   | 2.5894(19) |
| Ag2  | S1   | 2.531(2)   |
| Ag2  | N5   | 2.243(7)   |

## Reference

- [1] CrysAlisPro, Version 1.171.36.31, Software for Crystal Data Collection and Reduction, Agilent technologies Inc., Santa Clara, CA, USA, 2012.
- [2] CrysAlisPro 1.171.38.41k (Rigaku Oxford Diffraction, 2015).
- [3] G. M. Sheldrick, A short history of SHELX, *Acta Cryst. A*, 2008, 64, 112-122.
- [4] O. V. Dolomanov, L. J. Bourhis, R. J. Gildea, J. A. Howard, H. Puschmann, OLEX2: a Complete Structure Solution, Refinement and Analysis Program, *J. Appl. Cryst.*, 2009, 42, 339-341.
- [5] G. Sheldrick, Crystal Structure Refinement with SHELXL, *Acta Cryst. C*, 2015, 71, 3-8.
